# Supplementary material for: Chlorine–benzene complexes—the reliability of density functionals for non-covalent radical complexes
Source: Royal Society of Chemistry journal article supplement (doi:10.1039/b704966h), 2007-01-01
Supplement: b704966h.pdf [file b704966h.pdf]

# Chlorine-Benzene Complexes – The Reliability of Density Functionals for Non-Covalent Radical Complexes

A. K. Croft,\* and H. M. Howard-Jones

## Supplementary information

### Contents

|                                                                     |   |
|---------------------------------------------------------------------|---|
| Calculation of ZPE correction terms.....                            | 2 |
| Calculation of ZPE correction term for BH&HLYP/6-31G(d).....        | 3 |
| Calculation of ZPE correction term for BH&HLYP/6-311+G(d, p).....   | 3 |
| Calculation of ZPE correction term for B3PW91/6-311+G(d, p).....    | 4 |
| Calculation of ZPE correction term for MPW1K/6-311+G(3df, 2p).....  | 4 |
| Calculation of ZPE correction term for MPWB1K/6-311+G(3df, 2p)..... | 5 |

### *Key $\eta_1$ - $\pi$ Complex geometries (G03 archive entries)*

|                         |   |
|-------------------------|---|
| B3LYP/6-31G(d).....     | 6 |
| BH&HLYP/6-31G(d).....   | 6 |
| B3PW91/6-31G(d).....    | 6 |
| MPWB1K/6-31+G(d,p)..... | 6 |
| MPW1K/6-31+G(d,p).....  | 7 |

### *$\eta_1$ - $\sigma$ Complex geometries (G03 archive entries)*

|                            |   |
|----------------------------|---|
| BH&HLYP/6-31G(d).....      | 8 |
| MPWB1K/6-31+G(d,p).....    | 8 |
| MPW1K/6-31+G(d,p).....     | 8 |
| MPW1K/6-311+G(3df,2p)..... | 8 |

### Parameters for optimised DFT geometries

|                           |    |
|---------------------------|----|
| $\pi$ -geometries.....    | 9  |
| $\sigma$ -geometries..... | 10 |

|                                                                                     |    |
|-------------------------------------------------------------------------------------|----|
| Energies of the $\pi$ -complexes (inc zpe and counterpoise corrected energies)..... | 10 |
| DFT Energies of structures with a fully converged basis set (aug-cc-pVTZ).....      | 10 |

**Calculation of ZPE correction terms**

Scale factors were determined from a least squares fit to a series of 20 small molecules for which the ZPE has already been experimentally determined (listed below). This procedure was based on those already in the literature.

| Molecule                                        | Experimental kcal mol <sup>-1</sup> | Experimental (hartrees) |
|-------------------------------------------------|-------------------------------------|-------------------------|
| C <sub>2</sub> H <sub>2</sub>                   | 16.46                               | 0.026231                |
| C <sub>2</sub> H <sub>4</sub>                   | 31.47                               | 0.050151                |
| CH <sub>2</sub> ( <sup>1</sup> A <sub>1</sub> ) | 10.33                               | 0.016462                |
| CH <sub>2</sub> ( <sup>3</sup> B <sub>1</sub> ) | 10.55                               | 0.016812                |
| CH <sub>2</sub> O                               | 16.53                               | 0.026342                |
| CH <sub>3</sub> Cl                              | 23.45                               | 0.037370                |
| CH <sub>4</sub>                                 | 27.71                               | 0.044159                |
| CHN                                             | 9.95                                | 0.015856                |
| CO                                              | 3.11                                | 0.004956                |
| CO <sub>2</sub>                                 | 7.24                                | 0.011538                |
| F <sub>2</sub>                                  | 1.30                                | 0.002072                |
| H <sub>2</sub>                                  | 6.21                                | 0.009896                |
| H <sub>2</sub> O                                | 13.25                               | 0.021115                |
| H <sub>2</sub> S                                | 9.40                                | 0.014980                |
| NH <sub>3</sub>                                 | 21.20                               | 0.033784                |
| HF                                              | 5.85                                | 0.009323                |
| LiF                                             | 1.30                                | 0.002072                |
| N <sub>2</sub>                                  | 3.36                                | 0.005355                |
| O <sub>2</sub>                                  | 2.25                                | 0.003586                |
| NO <sub>2</sub>                                 | 6.77                                | 0.010789                |

Calculation of ZPE correction term for BH&amp;HLYP/6-31G(d)

**BH&HLYP/6-31G(d) ZPE scale factor**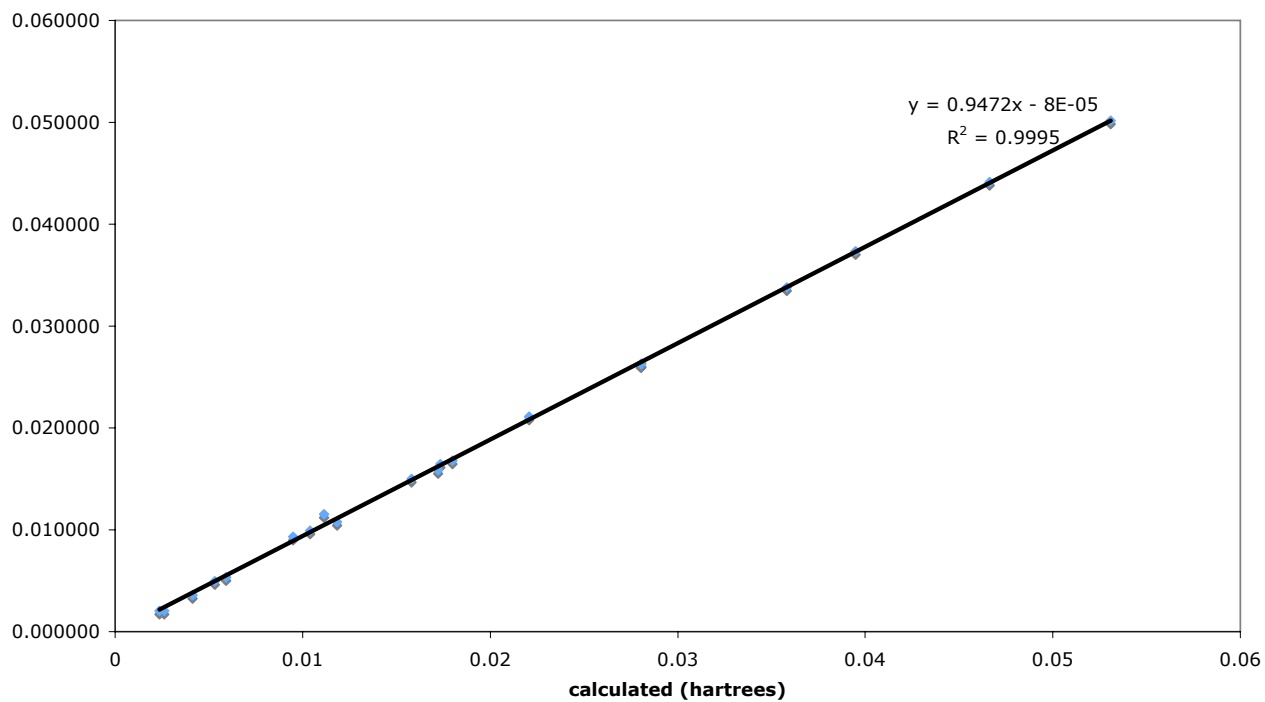

Calculation of ZPE correction term for BH&amp;HLYP/6-311+G(d, p)

**BH&HLYP/6-311+G(d,p) ZPE scale factor**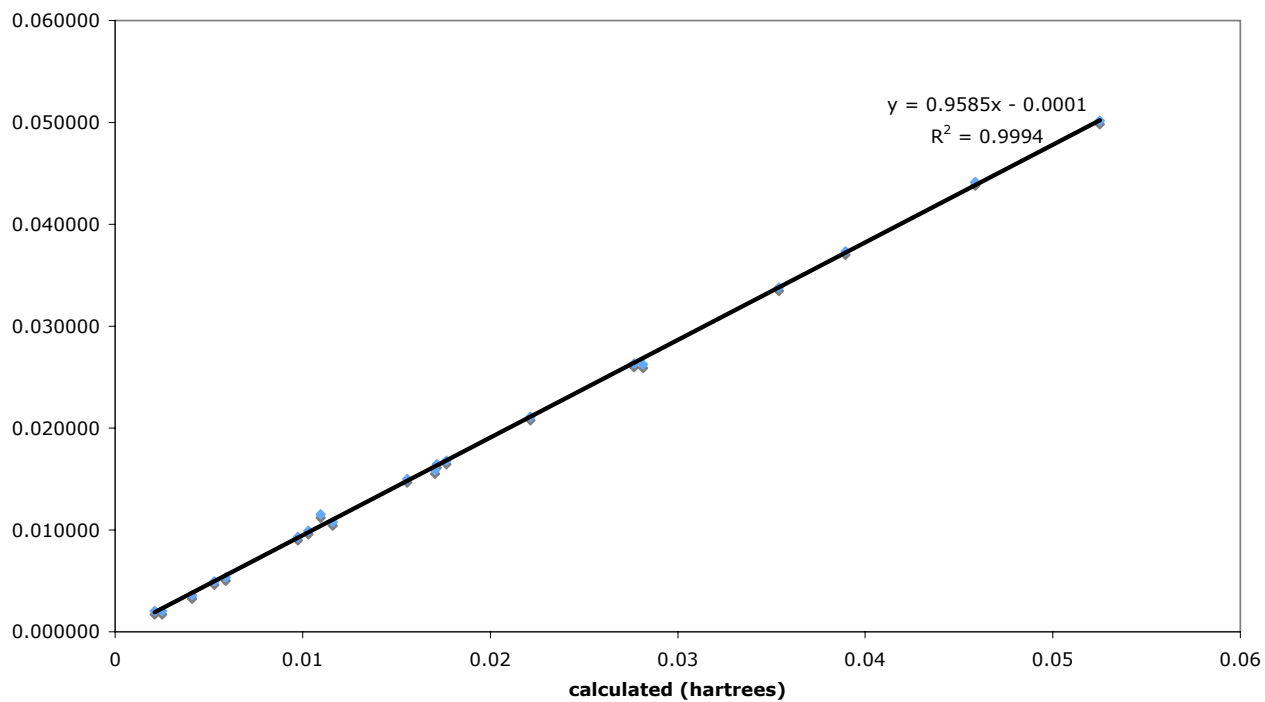

Calculation of ZPE correction term for B3PW91/6-311+G(d, p)

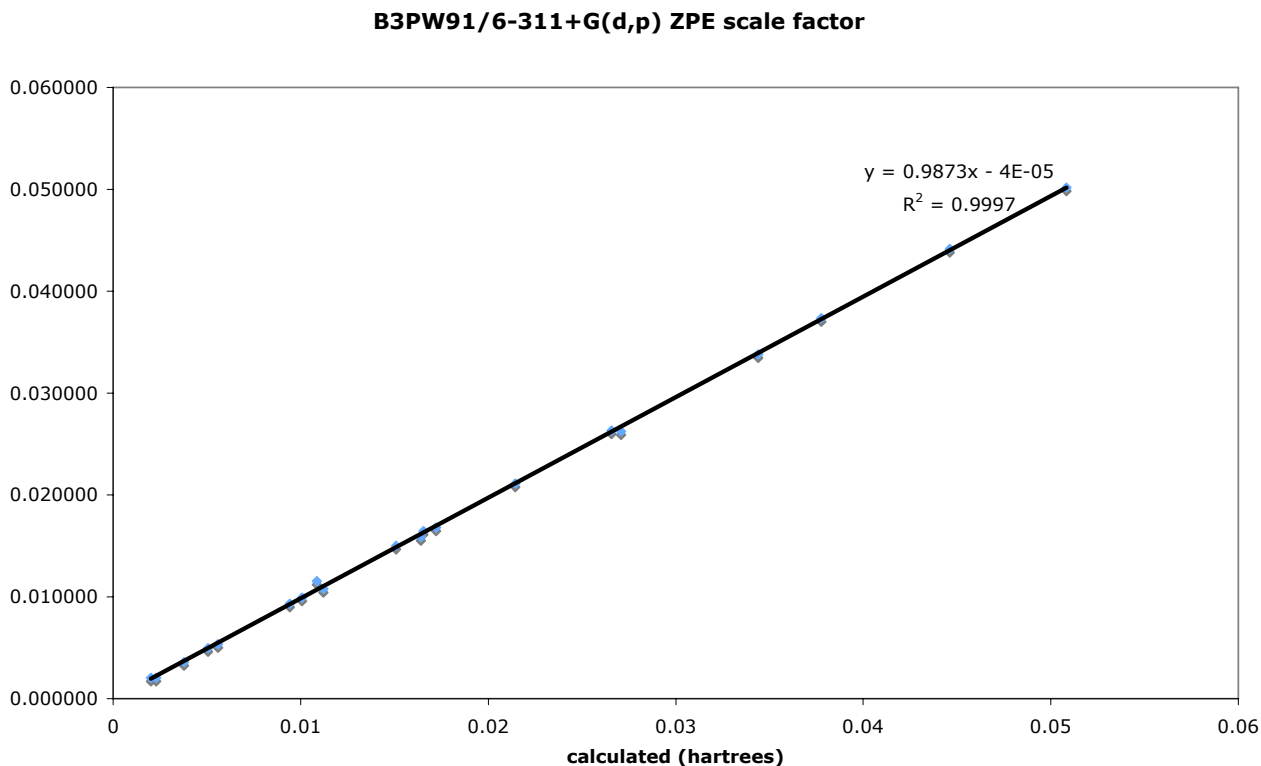

Calculation of ZPE correction term for MPW1K/6-311+G(3df, 2p)

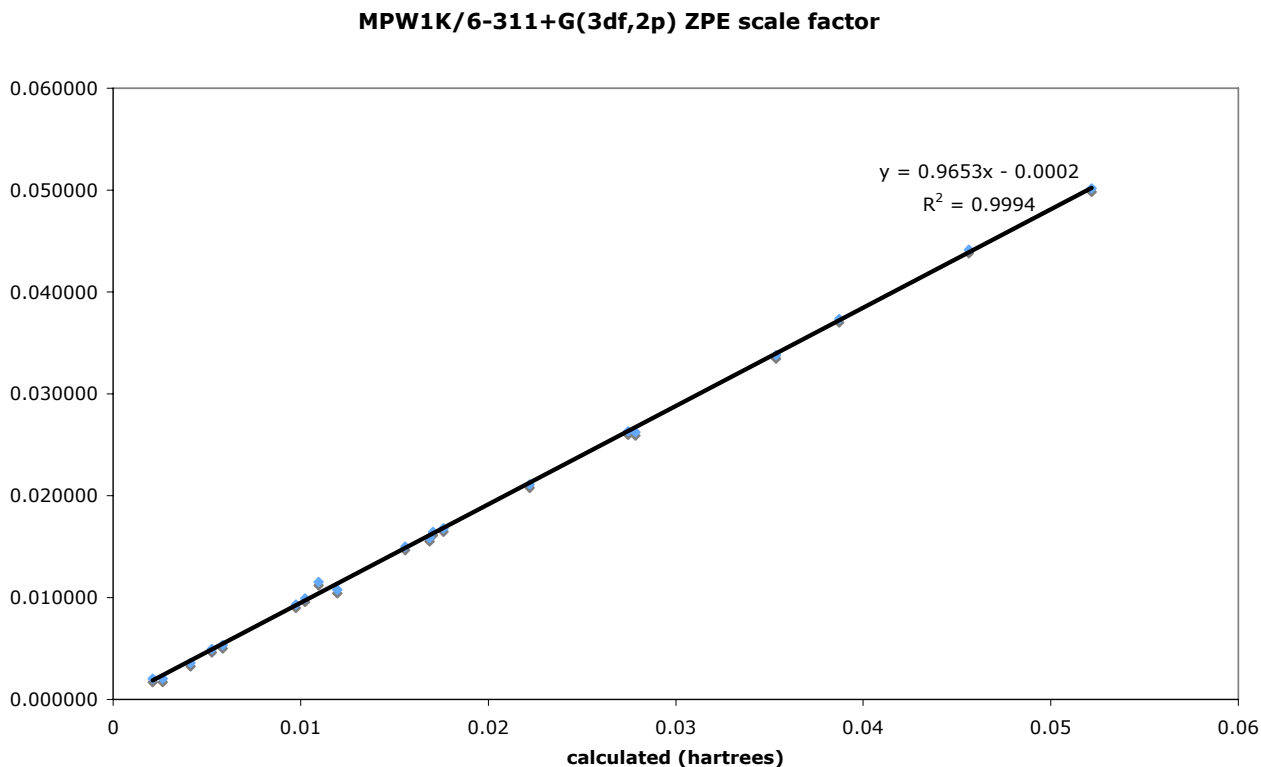

## Calculation of ZPE correction term for MPWB1K/6-311+G(3df, 2p)

**MPWB1K/6-311+G(3df,2p) ZPE scale factor**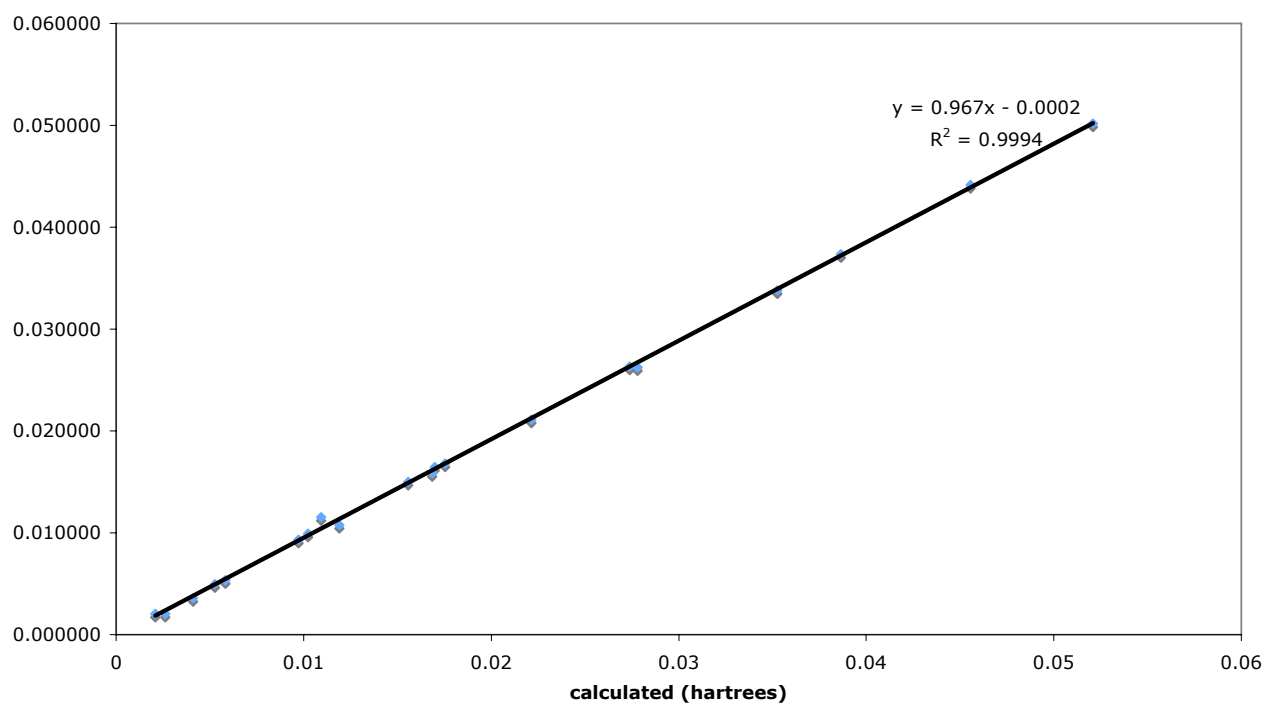

**Key  $\eta_1$ - $\pi$  Complex geometries****B3LYP/6-31G(d)**

```
1\1\GINC-NODE13\FOpt\UB3LYP\6-31G(d)\C6H6Cl1(2)\CHS60A\11-Jan-2006\0\
#\#P B3LYP/6-31G(D) OPT\Cmplx\0,2\C,0.,0.,0.\C,0.0030750793,-1.0827565
014,-0.8685209492\C,0.0081568466,-0.8667859538,-2.2538908637\C,0.00995
73362,0.4349647741,-2.7748137969\C,0.0069102752,1.5240371158,-1.914226
982\C,0.0148025945,1.3179725481,-0.514441476\H,-0.117029517,2.15979415
38,0.1553097937\H,0.010490012,2.5376583805,-2.3025141157\H,0.014677640
9,0.5884198723,-3.850039565\H,0.0124958705,-1.7170232976,-2.930802587\
H,0.002504134,-2.0962594488,-0.478018432\H,-0.0017021348,-0.1512807175
,1.074858688\Cl,2.5116563464,1.8183920484,-0.1070154679\Version=x86-L
inux-G03RevB.04\State=2-A\HF=-692.4018954\S2=0.759809\S2-1=0.\S2A=0.75
007\RMSD=1.725e-09\RMSF=9.026e-05\Dipole=-0.0033028,-1.3354626,0.87057
64\PG=C01 [X(C6H6Cl1)]\@
```

**BH&HLYP/6-31G(d)**

```
1\1\GINC-NODE01\FOpt\UBHandHLYP\6-31G(d)\C6H6Cl1(2)\CHS60A\10-Jan-2007
\0\#\#P BHANDHLYP/6-31G(D) OPT FREQ\C6H6---Cl\0,2\C,-1.2128776211,-0.
7287305917,-0.1210653571\C,-1.2134088238,-0.7182653024,1.2584255313\C,
-0.0077232078,-0.7132014784,1.9518619786\C,1.2030650774,-0.7199039407,
1.2673882453\C,1.2127526223,-0.7303754064,-0.1120686559\C,0.0025565588
,-0.7205748281,-0.8210563268\H,0.006440746,-0.8398275149,-1.8900898195
\H,2.1433989536,-0.7355595423,-0.6538477551\H,2.131024418,-0.716386899
4,1.8147452316\H,-0.0117149394,-0.7039570184,3.0297767399\H,-2.1453972
676,-0.7134870015,1.7988839647\H,-2.1394856833,-0.7326553931,-0.669733
0092\Cl,0.0064438885,1.7898930974,-1.4100381085\Version=x86-Linux-G03
RevB.04\State=2-A\HF=-692.2373767\S2=0.78169\S2-1=0.\S2A=0.750709\RMSD
=4.301e-09\RMSF=1.450e-05\Dipole=-0.0033626,-1.1273775,0.7004053\PG=C0
1 [X(C6H6Cl1)]\@
```

**B3PW91/6-31G(d)**

```
1\1\GINC-NODE03\FOpt\UB3PW91\6-31G(d)\C6H6Cl1(2)\CHS60A\10-Jan-2007\0\
#\#P B3PW91/6-31G(D) OPT FREQ=NORAMAN\C6H6---Cl\0,2\C,-1.2227796556,-
0.6987563189,-0.1130691525\C,-1.2220497047,-0.7061164767,1.2719230666\
C,-0.0077841987,-0.709009806,1.9690784619\C,1.2116220993,-0.707766669,
1.2809495719\C,1.2226357786,-0.700414624,-0.1039990909\C,0.002586572,-
0.6736359982,-0.8205634372\H,0.0064615065,-0.8298026001,-1.8938483439\
H,2.1598100123,-0.698904239,-0.6518701303\H,2.1463510738,-0.7132093024
,1.8343018484\H,-0.0118181824,-0.7127097959,3.0560079475\H,-2.16086418
57,-0.7102887996,1.8183263518\H,-2.1558611281,-0.6959775437,-0.6678769
975\Cl,0.006502098,1.7373583316,-1.4353504232\Version=x86-Linux-G03Re
vB.04\State=2-A\HF=-692.2563089\S2=0.76436\S2-1=0.\S2A=0.750146\RMSD=2
.357e-09\RMSF=2.070e-05\Dipole=-0.0041277,-1.335016,0.8687754\PG=C01 [
X(C6H6Cl1)]\@
```

**MPWB1K/6-31+G(d,p)**

```
1\1\GINC-NODE11\FOpt\UmPWB95\6-31+G(d,p)\C6H6Cl1(2)\CHS60A\21-Dec-2006
\0\#\#P MPWB95/6-31+G(D,P) OPT IOP(3/76=0560004400)\C6H6---Cl benzene
chlorine complex\0,2\C,-1.213437706,-0.7116415846,-0.136951476\C,-1.2
141453608,-0.698090188,1.2400567011\C,-0.0095558574,-0.6929530672,1.93
23940083\C,1.2006913143,-0.7035036009,1.2500572161\C,1.2113279218,-0.7
170775142,-0.1269099087\C,0.0018851741,-0.7039750694,-0.8362448894\H,0
.0060243572,-0.8338138529,-1.9060490861\H,2.142888529,-0.7201995338,-0
.6697256818\H,2.1291252681,-0.6986733338,1.7988084077\H,-0.0139929988,
-0.6787112562,3.0115426837\H,-2.1470614159,-0.6890873023,1.7810995653\
H,-2.1404750515,-0.7105965865,-0.6874644671\Cl,0.0095822586,1.74673694
18,-1.36838949\Version=x86-Linux-G03RevB.04\State=2-A\HF=-692.3323887
\S2=0.767227\S2-1=0.\S2A=0.75021\RMSD=3.975e-09\RMSF=4.642e-06\Dipole=
-0.0055702,-1.1398256,0.728098\PG=C01 [X(C6H6Cl1)]\@
```

**MPW1K/6-31+G(d,p)**

```
1\1\GINC-GN1\FOpt\UmPWPW91\6-31+G(d,p)\C6H6Cl1(2)\WEBMO\15-Nov-2006\0\
\#P MPWPW91/6-31+G(D,P) OPT IOP(3/76=0572004280 )\C6H6.Cl\0,2\C,-1.2
160007191,-0.6942279387,-0.1280581211\C,-1.2147392118,-0.7061225062,1.
2502291746\C,-0.0067587627,-0.7102053022,1.9434458503\C,1.2056624992,-
0.7077969437,1.2580216264\C,1.2158139397,-0.6959201164,-0.1202307642\C
,0.0022119982,-0.6599790058,-0.8325631953\H,0.0055447609,-0.8083185403
,-1.9005885377\H,2.1473551088,-0.6915710588,-0.6643952455\H,2.13513883
72,-0.715917567,1.8065297897\H,-0.010240574,-0.7166580551,3.0233819428
\H,-2.1477370959,-0.7129635709,1.792743372\H,-2.1440122121,-0.68858517
29,-0.6782086016\C1,0.0056948656,1.7282073437,-1.3885017732\Version=x
86-Linux-G03RevB.04\State=2-A\HF=-692.3553157\S2=0.791413\S2-1=0.\S2A=
0.751201\RMSD=6.399e-09\RMSF=8.624e-06\Dipole=-0.0032973,-1.1932889,0.
7623053\PG=C01 [X(C6H6Cl1)]\@
```

**$\eta_1$ - $\sigma$  Complex geometries****BH&HLYP/6-31G(d)**

```
1\1\GINC-NODE04\FOpt\UBHandHLYP\6-31G(d)\C6H6Cl1(2)\CHS60A\02-Feb-2007
\0\#P BHANDHLYP/6-31G(D) OPT FREQ\C6H6--Cl bh&hlyp\0,2\C,-1.247260
2879,-0.4971390901,-0.0069240867\C,-1.2482011403,-0.4816196546,1.35374
61392\C,-0.041987614,-0.4729000485,2.079004399\C,1.1876780262,-0.51447
05934,1.3954687751\C,1.2329096473,-0.5305873465,0.0355571778\C,0.00736
45235,-0.4348595039,-0.7723537021\H,0.0131644853,-1.0947861746,-1.6305
740948\H,2.1723375019,-0.5688872385,-0.4893879777\H,2.105826606,-0.549
479728,1.9593409556\H,-0.0602094765,-0.4567604432,3.1555532664\H,-2.18
5728497,-0.4916026312,1.8858336185\H,-2.16885381,-0.5103407341,-0.5637
45502\C1,0.0459084859,1.2506655513,-1.6955301459\Version=x86-Linux-G0
3RevB.04\State=2-A'\HF=-692.2345665\S2=0.857558\S2-1=0.\S2A=0.756943\R
MSD=5.292e-09\RMSF=3.577e-05\Dipole=-0.0253988,-0.9040328,0.7710466\PG
=CS [SG(C2H2Cl1),X(C4H4)]\@
```

**MPWB1K/6-31+G(d,p)**

```
1\1\GINC-NODE02\FOpt\UmpWB95\6-31+G(d,p)\C6H6Cl1(2)\CHS60A\02-Feb-2007
\0\#P MPWB95/6-31+G(D,P) OPT IOP(3/76=0560004400)\C6H6--Cl bb->sb\
0,2\C,-1.2432284348,-0.4917936707,-0.0128269309\C,-1.2447959979,-0.478
0902562,1.3456737645\C,-0.0417513439,-0.4676266645,2.0693623957\C,1.18
46476724,-0.5108544042,1.3872861708\C,1.229227852,-0.5251378987,0.0295
222114\C,0.007579591,-0.4243152272,-0.7766077274\H,0.0132163968,-1.092
5646488,-1.6318556731\H,2.1706599629,-0.5633332232,-0.4951620095\H,2.1
04552367,-0.5472430864,1.9504860548\H,-0.0599667128,-0.4494094836,3.14
7167961\H,-2.1840919734,-0.489405245,1.8770285744\H,-2.1668304245,-0.5
048366305,-0.569456143\C1,0.0454343736,1.2372765321,-1.6783922393\Ver
sion=x86-Linux-G03RevB.04\State=2-A'\HF=-692.3310476\S2=0.802758\S2-1=
0.\S2A=0.751691\RMSD=6.865e-09\RMSF=2.768e-05\Dipole=-0.0229608,-0.815
9354,0.6980761\PG=CS [SG(C2H2Cl1),X(C4H4)]\@
```

**MPW1K/6-31+G(d,p)**

```
1\1\GINC-NODE03\FOpt\UmpPWP91\6-31+G(d,p)\C6H6Cl1(2)\CHS60A\02-Feb-200
7\0\#P MPWP91/6-31+G(D,P) OPT IOP(3/76=0572004280)\C6H6--Cl bb->s
b 1k\0,2\C,-1.2473707562,-0.4762559333,-0.0052413776\C,-1.2479339994,
-0.4750783488,1.3561193715\C,-0.0420566319,-0.473464027,2.0825897911\C
,1.1875062305,-0.507923368,1.3978344891\C,1.2335253984,-0.5097139837,0
.0372523258\C,0.0077205277,-0.4116939826,-0.774898465\H,0.0126752619,-
1.1061454349,-1.6109558027\H,2.1762526146,-0.5405336562,-0.4871227395\
H,2.1081769934,-0.546641648,1.9612182504\H,-0.0604294686,-0.4659139609
,3.1611898405\H,-2.1880644169,-0.4887013504,1.8876306445\H,-2.17207836
07,-0.4818908643,-0.5616025547\C1,0.0455954566,1.2208591044,-1.7007232
029\Version=x86-Linux-G03RevB.04\State=2-A'\HF=-692.3574799\S2=0.8459
96\S2-1=0.\S2A=0.755349\RMSD=7.536e-09\RMSF=1.873e-06\Dipole=-0.022309
6,-0.792429,0.6785642\PG=CS [SG(C2H2Cl1),X(C4H4)]\@
```

**MPW1K/6-311+G(3df,2p)**

```
1\1\GINC-NODE01\FOpt\UmpPWP91\6-311+G(3df,2p)\C6H6Cl1(2)\CHS60A\01-Feb
-2007\0\#P MPWP91/6-311+G(3DF,2P) OPT IOP(3/76=0572004280)\C6H6--
Cl 1k opt freq bb\0,2\C,-1.2379298821,-0.4838315901,-0.0438857835\C,-
1.2203791903,-0.6336076491,1.3012580953\C,-0.0094814717,-0.6980392454,
2.0063959852\C,1.207203104,-0.639159465,1.3107984191\C,1.2360106533,-0
.489489426,-0.0341632732\C,0.0024746046,-0.3192215549,-0.8154404246\H,
0.0046495289,-0.9201202785,-1.7185425656\H,2.1694998511,-0.4472214569,
-0.5691131358\H,2.1330287087,-0.7263405876,1.8552496448\H,-0.013945049
3,-0.8106421266,3.0766480878\H,-2.1508445313,-0.7165434838,1.838414154
7\H,-2.1669825676,-0.4373040373,-0.5861553785\C1,0.0092474795,1.390486
209,-1.5438987598\Version=x86-Linux-G03RevB.04\State=2-A'\HF=-692.442
8134\S2=0.840803\S2-1=0.\S2A=0.754828\RMSD=9.977e-09\RMSF=1.183e-05\Di
pole=-0.0038628,-0.7823604,0.5276199\PG=CS [SG(C2H2Cl1),X(C4H4)]\@
```



**Parameters for optimised DFT geometries**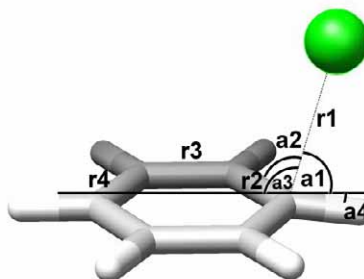

$r_1$ =Cl-C(ipso);  $r_2$ =C(i)-C(ortho);  $r_3$ =C(o)-C(meta);  $r_4$ =C(m)-C(para);  $a_1$ =Cl-C(i)-H(i);  $a_2$ =Cl-C(i)-C(o);  $a_3$ =Cl-C(i)-C(p);  $a_4$ =H(i)-C(i)-C(p).

**Table 1.** Geometric parameters (as specified in Figure 1) for the  $\pi$ -complex calculated at different levels of density functional theory.

| Level of Theory         | r1    | r2    | r3    | r4    | a1   | a2   | a3    | a4   |
|-------------------------|-------|-------|-------|-------|------|------|-------|------|
| B3LYP/6-31G(d)          | 2.579 | 1.414 | 1.389 | 1.402 | 82.4 | 97.7 | 104.6 | 7.1  |
| B3LYP/6-311+G(d,p)      | 2.579 | 1.412 | 1.385 | 1.399 | 82.4 | 97.7 | 104.6 | 7.1  |
| B3LYP/aug-cc-pVTZ       | 2.554 | 1.409 | 1.381 | 1.396 | 82.3 | 97.8 | 104.8 | 7.1  |
| BH&HLYP/6-31G(d)        | 2.579 | 1.403 | 1.379 | 1.391 | 83.2 | 97.0 | 103.1 | 6.2  |
| BH&HLYP/6-311+G(d,p)    | 2.594 | 1.400 | 1.378 | 1.389 | 82.8 | 96.9 | 102.9 | 5.8  |
| BH&HLYP/aug-cc-pVTZ     | 2.570 | 1.397 | 1.374 | 1.386 | 82.8 | 96.9 | 103.1 | 5.9  |
| B3PW91/6-31G(d)         | 2.488 | 1.415 | 1.385 | 1.400 | 84.0 | 98.2 | 105.0 | 9.0  |
| B3PW91/6-311+G(d,p)     | 2.485 | 1.413 | 1.382 | 1.398 | 84.0 | 98.2 | 104.9 | 8.8  |
| B3PW91/aug-cc-pVTZ      | 2.440 | 1.411 | 1.378 | 1.395 | 84.0 | 98.5 | 105.5 | 9.5  |
| MPWB1K/6-31+G(d,p)      | 2.508 | 1.402 | 1.377 | 1.389 | 84.7 | 96.6 | 102.0 | 6.7  |
| MPWB1K/6-311+G(3df,2p)  | 2.440 | 1.398 | 1.370 | 1.384 | 85.1 | 96.8 | 102.1 | 7.2  |
| MPWB1K/aug-cc-pVTZ      | 2.440 | 1.398 | 1.370 | 1.384 | 85.1 | 96.8 | 102.1 | 7.2  |
| MPW1K/6-31+G(d,p)       | 2.452 | 1.408 | 1.378 | 1.392 | 84.8 | 97.9 | 104.2 | 8.9  |
| MPW1K/6-311+G(3df,2p)   | -     | -     | -     | -     | -    | -    | -     | -    |
| MPW1K/aug-cc-pVTZ       | 2.353 | 1.406 | 1.370 | 1.388 | 85.5 | 99.1 | 105.8 | 11.3 |
| PBE1PBE/6-31+G(d,p)     | 2.448 | 1.416 | 1.384 | 1.400 | 84.8 | 98.3 | 104.8 | 10.6 |
| PBE1PBE/6-311+G(3df,2p) | 2.361 | 1.413 | 1.376 | 1.394 | 85.7 | 99.0 | 105.7 | 11.3 |
| PBE1PBE/aug-cc-pVTZ     | 2.375 | 1.412 | 1.377 | 1.394 | 85.0 | 99.1 | 106.1 | 11.1 |
| PBE/6-31+G(d,p)         | 2.462 | 1.426 | 1.393 | 1.410 | 84.2 | 98.6 | 106.0 | 10.2 |
| PBE/6-311+G(3df,2p)     | 2.389 | 1.422 | 1.385 | 1.404 | 84.9 | 99.4 | 106.8 | 11.7 |
| PBE/aug-cc-pVTZ         | 2.404 | 1.422 | 1.386 | 1.404 | 84.3 | 99.4 | 107.1 | 11.4 |

**Table 2.** Geometric parameters for the  $\sigma$ -complex calculated at different levels of density functional theory.

| Level of Theory       | r1    | r2    | r3    | r4    | a1    | a2    | a3    | a4   |
|-----------------------|-------|-------|-------|-------|-------|-------|-------|------|
| BH&HLYP/6-31G(d)      | 1.922 | 1.471 | 1.361 | 1.407 | 98.8  | 107.7 | 119.5 | 38.3 |
| BH&HLYP/aug-cc-pVTZ   | 1.915 | 1.466 | 1.354 | 1.403 | 98.7  | 107.5 | 119.4 | 38.1 |
| B3PW91/aug-cc-pVTZ    | 2.000 | 1.455 | 2.366 | 1.404 | 95.7  | 106.0 | 116.0 | 31.8 |
| MPWB1K/6-31+G(d,p)    | 1.867 | 1.464 | 1.351 | 1.399 | 100.1 | 107.8 | 119.6 | 39.6 |
| MPWB1K/aug-cc-pVTZ    | 1.884 | 1.461 | 1.351 | 1.398 | 99.4  | 107.6 | 119.4 | 38.8 |
| MPW1K/6-31+G(d,p)     | 1.877 | 1.474 | 1.361 | 1.408 | 100.1 | 108.2 | 120.8 | 41.0 |
| MPW1K/6-311+G(3df,2p) | 1.858 | 1.470 | 1.354 | 1.403 | 100.6 | 108.2 | 120.7 | 41.3 |
| MPW1K/aug-cc-pVTZ     | 1.871 | 1.468 | 1.354 | 1.402 | 100.0 | 108.0 | 120.9 | 41.0 |
| PBE1PBE/aug-cc-pVTZ   | 1.922 | 1.465 | 1.362 | 1.406 | 98.3  | 107.3 | 118.7 | 37.0 |

Energies of the  $\pi$ -complexes in Hartrees calculated for different DFT methods, with zero point correction energies and counterpoise corrected energies.

**Table 3.**

| Level of Theory         | Cl <sup>+</sup> | Benzene      | zpe      | Complex      | zpe      | CPC complex  |
|-------------------------|-----------------|--------------|----------|--------------|----------|--------------|
| B3LYP/6-31G(d)          | -460.1366841    | -232.2486611 | 0.100746 | -692.404760  | 0.101302 | -692.4001279 |
| B3LYP/6-311+G(d,p)      | -460.1668825    | -232.3112362 | 0.100149 | -692.4936911 | 0.100707 | -692.4926034 |
| BH&HLYP/6-31G(d)        | -460.127075     | -232.1003066 | 0.104440 | -692.2373767 | 0.10494  | -692.2358914 |
| BH&HLYP/6-311+G(d,p)    | -460.1554016    | -232.1587875 | 0.103654 | -692.3228968 | 0.104141 | -692.3217265 |
| B3PW91/6-31G(d)         | -460.0809243    | -232.1590497 | 0.100989 | -692.2563089 | 0.101497 | -692.2549924 |
| B3PW91/6-311+G(d,p)     | -460.1095778    | -232.2157704 | 0.100393 | -692.3409252 | 0.100851 | -692.3395890 |
| MPWB1K/6-31+G(d,p)      | -460.1822126    | -232.1379445 | 0.103344 | -692.3323887 | 0.103733 | -692.3318755 |
| MPW1K/6-31+G(d,p)       | -460.1441181    | -232.2001933 | 0.103547 | -692.3553157 | 0.103869 | -692.354693  |
| PBE1PBE/6-31+G(d,p)     | -459.969235     | -231.9812489 | 0.101153 | -691.9666877 | 0.101541 | -691.9661192 |
| PBE1PBE/6-311+G(3df,2p) | -459.9978384    | -232.0346681 | 0.100438 | -692.0500185 | 0.100837 | -692.0480439 |
| PBE/6-31+G(d,p)         | -459.929279     | -231.953918  | 0.097792 | -691.9069434 | 0.098181 | -691.9064083 |
| PBE/6-311+G(3df,2p)     | -459.9591998    | -232.0090607 | 0.097220 | -691.9930102 | 0.097686 | -691.9908631 |

DFT Energies of structures with a fully converged basis set (aug-cc-pVTZ)

**Table 4.**

| DFT Method | Cl <sup>+</sup> | Benzene      | zpe      | $\pi$ -complex | zpe      | $\sigma$ -complex | zpe      |
|------------|-----------------|--------------|----------|----------------|----------|-------------------|----------|
| B3LYP      | -460.1753305    | -232.3355734 | 0.100334 | -692.5254284   | 0.100855 | n/i               | -        |
| BH&HLYP    | -460.1649646    | -232.1836527 | 0.103794 | -692.356243    | 0.10426  | -692.3541938      | 0.103248 |
| B3PW91     | -460.1189712    | -232.2391325 | 0.100351 | -692.372695    | 0.100807 | -692.3716222      | 0.099953 |
| MPWB1K     | -460.2184347    | -232.1987781 | 0.102849 | -692.4296331   | 0.10331  | -692.4298246      | 0.102511 |
| MPW1K      | -460.1806047    | -232.2619143 | 0.10301  | -692.4532949   | 0.103172 | -692.4565329      | 0.102642 |
| PBE1PBE    | -460.0057068    | -232.0424638 | 0.100792 | -692.0641541   | 0.101061 | -692.0648897      | 0.100446 |
| PBEPBE     | -459.9662324    | -232.0171272 | 0.097593 | -692.0067246   | 0.097890 | n/i               | -        |
